# Supplementary material
Source: publisher figshare collection journal article supplement (https://frontiersin.figshare.com/ndownloader/files/28106493)
Supplement: Supplementary file [file 28106493]

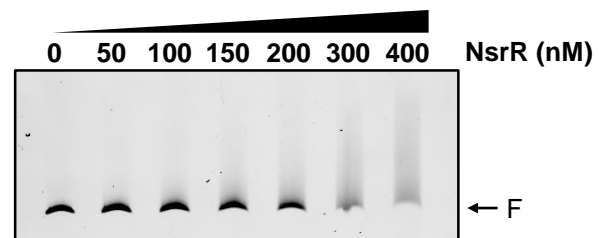

**Supplementary Figure 5.** Interaction between NsrR and the *isc* operon regulatory region. A 321-bp DNA fragment of the *isc* operon regulatory region (10 nM) was labeled with 6-FAM, and then incubated with increasing amounts of NsrR as indicated. F, free DNA.
